# Supplementary material for: Hyperhomocysteinemia Concurrent with Metabolic Syndrome Is Independently Associated with Chronic Kidney Disease among Community-Dwelling Adults in an Urban Korean Population
Source: PubMed Central journal article supplement (PMC7558526; doi:10.3390/ijerph17186810), 2020-09-18
Supplement: ijerph-17-06810-s001.pdf [file ijerph-17-06810-s001.pdf]

**Table S1.** Exclusion criteria

| Exclusion criteria                           | ICD codes                                                                                                                                                                                                                                                                                                                                                       |
|----------------------------------------------|-----------------------------------------------------------------------------------------------------------------------------------------------------------------------------------------------------------------------------------------------------------------------------------------------------------------------------------------------------------------|
| Age < 19 years                               |                                                                                                                                                                                                                                                                                                                                                                 |
| Incomplete data                              |                                                                                                                                                                                                                                                                                                                                                                 |
| Menstruation on the examination day          |                                                                                                                                                                                                                                                                                                                                                                 |
| Pregnancy                                    |                                                                                                                                                                                                                                                                                                                                                                 |
| Pyuria and suspected urinary tract infection |                                                                                                                                                                                                                                                                                                                                                                 |
| Current or past diagnosis of cancer          | C00-C97 for malignant neoplasms                                                                                                                                                                                                                                                                                                                                 |
| History of liver disease                     | K70 for alcoholic liver disease; K71 for toxic liver disease; K72 for hepatic failure, not elsewhere classified; K73 for chronic hepatitis, not elsewhere classified; K74 for fibrosis and cirrhosis of the liver; K75 for other inflammatory liver diseases; K76 for other diseases of the liver; and K77 for liver disorders in diseases classified elsewhere |
| History of ischemic heart disease            | I20-I25 for ischemic heart disease                                                                                                                                                                                                                                                                                                                              |
| History of pulmonary disease                 | J30-J39 for other diseases of the upper respiratory tract, J40-J47 for chronic lower respiratory diseases, J80-J84 for other respiratory diseases principally affecting the interstitium, J85-J86 for suppurative and necrotic conditions of the lower respiratory tract, J95-J99 for other diseases of the respiratory system                                  |
| History of organ transplantation             | Z94                                                                                                                                                                                                                                                                                                                                                             |
| History of kidney disease                    | N00-N08 for glomerular diseases, N10-N16 for renal tubulo-interstitial diseases, N17-N19 for renal failure, N20-N23 for urolithiasis, N25-N29 for other disorders of the kidney and ureter, N30-N39 for other diseases of the urinary system                                                                                                                    |

Abbreviations: ICD, International Statistical Classification of Diseases and Related Health Problems codes

**Table S2.** Subgroup analyses of MetS patients for calculating the odds for CKD development, low eGFR, and albuminuria development in HHcy

|                     | Males (n=1,784) |              |        | Females (n=2,307) |              |        |
|---------------------|-----------------|--------------|--------|-------------------|--------------|--------|
|                     | OR              | 95% CI       | P      | OR                | 95% CI       | P      |
| Odds of CKD         |                 |              |        |                   |              |        |
| HHcy+ vs HHcy-      | 1.750           | 1.223-2.505  | 0.002  | 3.224             | 1.851-5.616  | <0.001 |
| Odds of low eGFR    |                 |              |        |                   |              |        |
| HHcy+ vs HHcy-      | 7.032           | 3.013-16.413 | <0.001 | 14.637            | 6.090-35.179 | <0.001 |
| Odds of albuminuria |                 |              |        |                   |              |        |
| HHcy+ vs HHcy-      | 1.456           | 0.993-2.136  | 0.055  | 2.534             | 1.353-4.747  | 0.004  |

Abbreviations: HHcy, hyperhomocysteinemia; MetS, metabolic syndrome; CKD, chronic kidney disease; eGFR, estimated glomerular filtration rate; OR, odds ratio; CI, confidence interval  
P-values calculated using logistic regression.

Multivariate logistic regression analysis adjusted for age, smoking, drinking, physical activity, high-sensitivity c-reactive protein level, and albumin level.

**Table S3.** Propensity score-matched logistic regression analyses of the subgroups of MetS patients for calculating the odds of CKD development, low eGFR, and albuminuria development in HHcy (n=297)

|                     | OR    | 95% CI       | P      |
|---------------------|-------|--------------|--------|
| Odds of CKD         |       |              |        |
| HHcy+ vs HHcy-      | 1.509 | 0.989-2.303  | 0.056  |
| Odds of low eGFR    |       |              |        |
| HHcy+ vs HHcy-      | 6.692 | 2.292-19.539 | <0.001 |
| Odds of albuminuria |       |              |        |
| HHcy+ vs HHcy-      | 1.232 | 0.788-1.926  | 0.360  |

Abbreviations: HHcy, hyperhomocysteinemia; MetS, metabolic syndrome; CKD, chronic kidney disease; eGFR, estimated glomerular filtration rate; OR, odds ratio; CI, confidence interval  
P-values calculated using conditional logistic regression after propensity score matching.

**Table S4.** Odds for CKD development, low eGFR, and albuminuria development according to individual MetS components

|                      | Males |             |        | Females |             |        |
|----------------------|-------|-------------|--------|---------|-------------|--------|
|                      | OR    | 95% CI      | P      | OR      | 95% CI      | P      |
| Odds of CKD          |       |             |        |         |             |        |
| Central obesity      | 1.228 | 1.062-1.420 | 0.006  | 1.401   | 1.195-1.641 | <0.001 |
| High TG              | 1.120 | 0.990-1.268 | 0.072  | 1.114   | 0.943-1.316 | 0.205  |
| Low HDL              | 1.005 | 0.838-1.206 | 0.957  | 1.248   | 1.066-1.461 | 0.006  |
| High BP              | 1.044 | 0.927-1.175 | 0.480  | 1.184   | 1.011-1.387 | 0.036  |
| High fasting glucose | 0.991 | 0.874-1.123 | 0.884  | 0.993   | 0.837-1.177 | 0.932  |
| Odds of low eGFR     |       |             |        |         |             |        |
| Central obesity      | 0.784 | 0.532-1.154 | 0.217  | 1.250   | 0.821-1.902 | 0.298  |
| High TG              | 0.937 | 0.694-1.264 | 0.668  | 1.170   | 0.760-1.800 | 0.476  |
| Low HDL              | 0.610 | 0.362-1.028 | 0.064  | 1.251   | 0.832-1.880 | 0.282  |
| High BP              | 0.890 | 0.670-1.183 | 0.424  | 0.996   | 0.653-1.518 | 0.984  |
| High fasting glucose | 0.837 | 0.615-1.139 | 0.258  | 0.704   | 0.439-1.128 | 0.145  |
| Odds of albuminuria  |       |             |        |         |             |        |
| Central obesity      | 1.308 | 1.125-1.520 | <0.001 | 1.415   | 1.197-1.673 | <0.001 |
| High TG              | 1.164 | 1.022-1.326 | 0.022  | 1.101   | 0.923-1.314 | 0.284  |
| Low HDL              | 1.076 | 0.891-1.298 | 0.447  | 1.270   | 1.075-1.500 | 0.005  |
| High BP              | 1.045 | 0.923-1.184 | 0.486  | 1.210   | 1.024-1.429 | 0.025  |
| High fasting glucose | 1.012 | 0.887-1.154 | 0.857  | 1.056   | 0.884-1.263 | 0.547  |
| Central obesity      | 1.308 | 1.125-1.520 | <0.001 | 1.415   | 1.197-1.673 | <0.001 |

Abbreviations: MetS, metabolic syndrome; CKD, chronic kidney disease; eGFR, estimated glomerular filtration rate; TG, triglyceride; HDL, high-density lipoprotein-cholesterol; BP, blood pressure; OR, odds ratio; CI, confidence interval

P-values calculated using logistic regression.

Multivariate logistic regression analysis adjusted for age, smoking, drinking, physical activity, high-sensitivity c-reactive protein level, and albumin level.

**Table S5.** Odds for CKD development for the combination of HHcy and MetS components

|                                                            | Males |             |        | Females |             |        |
|------------------------------------------------------------|-------|-------------|--------|---------|-------------|--------|
|                                                            | OR    | 95% CI      | P      | OR      | 95% CI      | P      |
| Central obesity                                            |       |             |        |         |             |        |
| HHcy+/Central obesity+ vs HHcy-/Central obesity-           | 2.318 | 1.691-3.177 | <0.001 | 4.319   | 2.681-6.958 | <0.001 |
| HHcy+/Central obesity+ vs HHcy-/Central obesity+           | 1.255 | 0.947-1.662 | 0.114  | 1.460   | 1.032-2.067 | 0.033  |
| HHcy+/Central obesity+ vs HHcy+/Central obesity-           | 1.221 | 0.866-1.724 | 0.255  | 2.322   | 1.205-4.472 | 0.012  |
| High TG                                                    |       |             |        |         |             |        |
| HHcy+/High TG+ vs HHcy-/High TG-                           | 2.132 | 1.656-2.744 | <0.001 | 2.242   | 1.228-4.093 | 0.009  |
| HHcy+/High TG+ vs HHcy-/High TG+                           | 0.987 | 0.694-1.402 | 0.940  | 0.968   | 0.711-1.319 | 0.838  |
| HHcy+/High TG+ vs HHcy+/High TG-                           | 1.121 | 0.840-1.497 | 0.438  | 0.786   | 0.387-1.596 | 0.505  |
| Low HDL                                                    |       |             |        |         |             |        |
| HHcy+/Low HDL+ vs HHcy-/Low HDL-                           | 1.803 | 1.141-2.848 | 0.012  | 2.242   | 1.228-4.093 | 0.009  |
| HHcy+/Low HDL+ vs HHcy-/Low HDL+                           | 0.879 | 0.656-1.178 | 0.388  | 1.058   | 0.752-1.488 | 0.746  |
| HHcy+/Low HDL+ vs HHcy+/Low HDL-                           | 0.882 | 0.551-1.412 | 0.602  | 1.453   | 0.752-2.808 | 0.266  |
| High BP                                                    |       |             |        |         |             |        |
| HHcy+/High BP+ vs HHcy-/High BP-                           | 2.314 | 1.738-3.083 | <0.001 | 2.254   | 1.115-4.558 | 0.024  |
| HHcy+/High BP+ vs HHcy-/High BP+                           | 0.937 | 0.676-1.299 | 0.697  | 0.913   | 0.670-1.244 | 0.564  |
| HHcy+/High BP+ vs HHcy+/High BP-                           | 1.214 | 0.928-1.588 | 0.158  | 0.947   | 0.488-1.838 | 0.872  |
| High fasting glucose                                       |       |             |        |         |             |        |
| HHcy+/High fasting glucose+ vs HHcy-/High fasting glucose- | 2.079 | 1.529-2.827 | <0.001 | 2.605   | 1.209-5.615 | 0.015  |
| HHcy+/High fasting glucose+ vs HHcy-/High fasting glucose+ | 0.958 | 0.695-1.319 | 0.790  | 0.697   | 0.529-0.919 | 0.011  |
| HHcy+/High fasting glucose+ vs HHcy+/High fasting glucose- | 1.014 | 0.757-1.357 | 0.928  | 1.280   | 0.641-2.555 | 0.484  |

Abbreviations: HHcy, hyperhomocysteinemia; MetS, metabolic syndrome; CKD, chronic kidney disease; TG, triglyceride; HDL, high-density lipoprotein-cholesterol; BP, blood pressure; OR, odds ratio; CI, confidence interval;

P-values calculated using logistic regression.

Multivariate logistic regression analysis adjusted for age, smoking, drinking, physical activity, high-sensitivity c-reactive protein level, and albumin level.

**Table S6.** Odds for low eGFR for the combination of HHcy and MetS components

|                                                                                                                                                                                                                                            | Males |             |        | Females |              |        |
|--------------------------------------------------------------------------------------------------------------------------------------------------------------------------------------------------------------------------------------------|-------|-------------|--------|---------|--------------|--------|
|                                                                                                                                                                                                                                            | OR    | 95% CI      | P      | OR      | 95% CI       | P      |
| Central obesity                                                                                                                                                                                                                            |       |             |        |         |              |        |
| HHcy+/Central obesity+ vs HHcy-/Central obesity-                                                                                                                                                                                           | 5.257 | 3.032-9.115 | <0.001 | 12.743  | 6.231-26.061 | <0.001 |
| HHcy+/Central obesity+ vs HHcy-/Central obesity+                                                                                                                                                                                           | 1.334 | 0.560-3.177 | 0.515  | 1.378   | 0.568-3.342  | 0.479  |
| HHcy+/Central obesity+ vs HHcy+/Central obesity-                                                                                                                                                                                           | 1.212 | 0.695-2.115 | 0.497  | 2.565   | 1.092-6.023  | 0.031  |
| High TG                                                                                                                                                                                                                                    |       |             |        |         |              |        |
| HHcy+/High TG+ vs HHcy-/High TG-                                                                                                                                                                                                           | 4.862 | 3.048-7.758 | <0.001 | 6.221   | 2.643-14.644 | <0.001 |
| HHcy+/High TG+ vs HHcy-/High TG+                                                                                                                                                                                                           | 0.551 | 0.220-1.380 | 0.203  | 1.411   | 0.578-3.446  | 0.450  |
| HHcy+/High TG+ vs HHcy+/High TG-                                                                                                                                                                                                           | 0.954 | 0.594-1.531 | 0.845  | 0.910   | 0.368-2.253  | 0.838  |
| Low HDL                                                                                                                                                                                                                                    |       |             |        |         |              |        |
| HHcy+/Low HDL+ vs HHcy-/Low HDL-                                                                                                                                                                                                           | 4.445 | 1.977-9.996 | <0.001 | 9.384   | 3.858-22.824 | <0.001 |
| HHcy+/Low HDL+ vs HHcy-/Low HDL+                                                                                                                                                                                                           | 0.940 | 0.398-2.219 | 0.887  | 2.292   | 0.758-6.926  | 0.142  |
| HHcy+/Low HDL+ vs HHcy+/Low HDL-                                                                                                                                                                                                           | 0.840 | 0.382-1.846 | 0.665  | 2.683   | 1.134-6.348  | 0.025  |
| High BP                                                                                                                                                                                                                                    |       |             |        |         |              |        |
| HHcy+/High BP+ vs HHcy-/High BP-                                                                                                                                                                                                           | 4.297 | 2.498-7.390 | <0.001 | 6.788   | 2.500-18.436 | <0.001 |
| HHcy+/High BP+ vs HHcy-/High BP+                                                                                                                                                                                                           | 1.625 | 0.538-4.914 | 0.389  | 0.913   | 0.670-1.244  | 0.564  |
| HHcy+/High BP+ vs HHcy+/High BP-                                                                                                                                                                                                           | 0.843 | 0.542-1.313 | 0.450  | 0.903   | 0.370-2.201  | 0.822  |
| High fasting glucose                                                                                                                                                                                                                       |       |             |        |         |              |        |
| HHcy+/High fasting glucose+ vs HHcy-/High fasting glucose-                                                                                                                                                                                 | 4.715 | 2.688-8.271 | <0.001 | 6.427   | 2.128-19.406 | <0.001 |
| HHcy+/High fasting glucose+ vs HHcy-/High fasting glucose+                                                                                                                                                                                 | 0.591 | 0.252-1.382 | 0.225  | 0.317   | 0.147-0.684  | 0.003  |
| HHcy+/High fasting glucose+ vs HHcy+/High fasting glucose-                                                                                                                                                                                 | 1.070 | 0.669-1.710 | 0.778  | 1.110   | 0.446-2.765  | 0.822  |
| Abbreviations: HHcy, hyperhomocysteinemia; MetS, metabolic syndrome; eGFR, estimated glomerular filtration rate; TG, triglyceride; HDL, high-density lipoprotein-cholesterol; BP, blood pressure; OR, odds ratio; CI, confidence interval; |       |             |        |         |              |        |
| P-values calculated using logistic regression.                                                                                                                                                                                             |       |             |        |         |              |        |
| Multivariate logistic regression analysis adjusted for age, smoking, drinking, physical activity, high-sensitivity c-reactive protein level, and albumin level.                                                                            |       |             |        |         |              |        |

**Table S7.** Odds of albuminuria development for the combination of HHcy and MetS components

|                                                                                                                                                                                                | Males |             |        | Females |             |        |
|------------------------------------------------------------------------------------------------------------------------------------------------------------------------------------------------|-------|-------------|--------|---------|-------------|--------|
|                                                                                                                                                                                                | OR    | 95% CI      | P      | OR      | 95% CI      | P      |
| Central obesity                                                                                                                                                                                |       |             |        |         |             |        |
| HHcy+/Central obesity+ vs HHcy-/Central obesity-                                                                                                                                               | 2.002 | 1.425-2.812 | <0.001 | 3.276   | 1.902-5.643 | <0.001 |
| HHcy+/Central obesity+ vs HHcy-/Central obesity+                                                                                                                                               | 1.201 | 0.899-1.604 | 0.215  | 1.428   | 0.992-2.056 | 0.055  |
| HHcy+/Central obesity+ vs HHcy+/Central obesity-                                                                                                                                               | 1.261 | 0.870-1.828 | 0.222  | 2.628   | 1.208-5.718 | 0.015  |
| High TG                                                                                                                                                                                        |       |             |        |         |             |        |
| HHcy+/High TG+ vs HHcy-/High TG-                                                                                                                                                               | 1.858 | 1.415-2.440 | <0.001 | 1.725   | 0.850-3.498 | 0.131  |
| HHcy+/High TG+ vs HHcy-/High TG+                                                                                                                                                               | 1.089 | 0.751-1.578 | 0.654  | 0.896   | 0.650-1.236 | 0.503  |
| HHcy+/High TG+ vs HHcy+/High TG-                                                                                                                                                               | 1.214 | 0.886-1.662 | 0.227  | 0.921   | 0.401-2.112 | 0.845  |
| Low HDL                                                                                                                                                                                        |       |             |        |         |             |        |
| HHcy+/Low HDL+ vs HHcy-/Low HDL-                                                                                                                                                               | 1.637 | 1.002-2.675 | 0.049  | 2.065   | 0.983-4.338 | 0.055  |
| HHcy+/Low HDL+ vs HHcy-/Low HDL+                                                                                                                                                               | 0.879 | 0.656-1.178 | 0.388  | 1.058   | 0.752-1.488 | 0.746  |
| HHcy+/Low HDL+ vs HHcy+/Low HDL-                                                                                                                                                               | 0.954 | 0.576-1.580 | 0.856  | 1.441   | 0.661-3.143 | 0.359  |
| High BP                                                                                                                                                                                        |       |             |        |         |             |        |
| HHcy+/High BP+ vs HHcy-/High BP-                                                                                                                                                               | 2.073 | 1.523-2.821 | <0.001 | 1.972   | 0.873-4.454 | 0.103  |
| HHcy+/High BP+ vs HHcy-/High BP+                                                                                                                                                               | 0.911 | 0.651-1.273 | 0.584  | 0.913   | 0.670-1.244 | 0.564  |
| HHcy+/High BP+ vs HHcy+/High BP-                                                                                                                                                               | 1.295 | 0.965-1.739 | 0.085  | 1.201   | 0.554-2.606 | 0.643  |
| High fasting glucose                                                                                                                                                                           |       |             |        |         |             |        |
| HHcy+/High fasting glucose+ vs HHcy-/High fasting glucose-                                                                                                                                     | 1.748 | 1.249-2.447 | <0.001 | 2.422   | 1.001-5.857 | <0.001 |
| HHcy+/High fasting glucose+ vs HHcy-/High fasting glucose+                                                                                                                                     | 0.998 | 0.715-1.394 | 0.993  | 0.806   | 0.602-1.079 | 0.147  |
| HHcy+/High fasting glucose+ vs HHcy+/High fasting glucose-                                                                                                                                     | 0.926 | 0.670-1.281 | 0.644  | 1.623   | 0.729-3.613 | 0.236  |
| Abbreviations: HHcy, hyperhomocysteinemia; MetS, metabolic syndrome; TG, triglyceride; HDL, high-density lipoprotein-cholesterol; BP, blood pressure; OR, odds ratio; CI, confidence interval; |       |             |        |         |             |        |
| P-values calculated using logistic regression.                                                                                                                                                 |       |             |        |         |             |        |
| Multivariate logistic regression analysis adjusted for age, smoking, drinking, physical activity, high-sensitivity c-reactive protein level, and albumin level.                                |       |             |        |         |             |        |
